# Supplementary material for: The patient experience of pulmonary hypertension: a large cross-sectional study of UK patients
Source: PubMed Central journal article supplement (PMC6429756; doi:10.1186/s12890-019-0827-5), 2019-03-21

LIVE

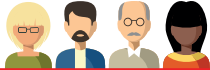

BETTER WITH PH

# The financial impact of pulmonary hypertension

Our most recent *Living with PH* survey showed that 89% of people living with pulmonary hypertension think that the financial worries linked to their condition have an impact on their lives.

*We want to know more, with the ultimate goal of helping people live better with PH.*

This is the first time that research has looked specifically at the financial impact of PH, and the results of this ground-breaking study will play a **vital part** in helping us push for change. All responses are **anonymous and confidential**. Please, share your voice and help us stand up for people affected by pulmonary hypertension.

## About you

We would like to know a little more about you. All information will be kept confidential.

1. Are you: Male  Female       2. What is your current age? \_\_\_\_\_ Years      3. What was your age at diagnosis? \_\_\_\_\_ Years

## Before your diagnosis

4. What was your employment situation? (Mark all those that apply)

In full time education  Working full-time  Working part-time  Looking for employment   
Unable to work for medical reasons  At home with children / caring for a loved one  Retired

5. Did you live:

Alone  With a spouse or partner  With children under 18 years old   
With children over 18 years old  With parents  With friends / house share

6. Approximately what **was** your monthly income? (including wages after tax and deductions, and any benefits you were entitled to at the time, eg. child allowance, working tax credit, housing benefit)

£ \_\_\_\_\_ You      £ \_\_\_\_\_ Your partner\*

\*Partner' refers to your husband, wife, or partner who lives in the same house as you.

# After your diagnosis

**7. Approximately what is your monthly income now?** (including wages after tax and deductions, and any benefits you are entitled to eg. child allowance, working tax credit, housing benefit)

£ \_\_\_\_\_ You

£ \_\_\_\_\_ Your partner

**8. Immediately after your diagnosis, how did your working situation change?**

|                                | You                      | Your partner/carer       |
|--------------------------------|--------------------------|--------------------------|
| Continued working as before    | <input type="checkbox"/> | <input type="checkbox"/> |
| Reduced your hours             | <input type="checkbox"/> | <input type="checkbox"/> |
| Taken long-term sick leave     | <input type="checkbox"/> | <input type="checkbox"/> |
| Had to give up work completely | <input type="checkbox"/> | <input type="checkbox"/> |
| I was not working              | <input type="checkbox"/> | <input type="checkbox"/> |

**9. What is your working situation now?**

|                                                 | You                      | Your partner/carer       |
|-------------------------------------------------|--------------------------|--------------------------|
| I have continued working as before my diagnosis | <input type="checkbox"/> | <input type="checkbox"/> |
| I have reduced my hours                         | <input type="checkbox"/> | <input type="checkbox"/> |
| I have taken long-term sick leave               | <input type="checkbox"/> | <input type="checkbox"/> |
| I have had to give up work completely           | <input type="checkbox"/> | <input type="checkbox"/> |
| I was not working and am still not working      | <input type="checkbox"/> | <input type="checkbox"/> |

**10. Have you tried to claim any benefit support since being diagnosed with PH?** (eg. DLA, PIP, ESA)

Yes  No

**11. How easy did you and/or your partner find applying for benefit support?** (eg. DLA, PIP, ESA)

Very easy  Quite easy  Quite difficult  Difficult  Extremely difficult

**12. Did the department dealing with your claim understand your diagnosis?**

Yes  No

**13. Was your claim successful first time?**

Yes  No

**14. If no, and you appealed, how many times did you have to appeal until you were successful?**

Once  Twice  Three times  I was never successful

**15. Did you get what you applied for in the end after appealing?**

Yes  No

**16. If you are in receipt of benefits do you feel embarrassed by it?**

Not at all  Slightly  Embarrassed  Very  Extremely   
embarrassed embarrassed embarrassed embarrassed

**17. If you had to reduce hours or stop working because of PH, were you able to return to work?**

Yes, at the same hours as before  Yes, at reduced hours  No

**18. If you were employed at the time of your diagnosis, have you ever been given any support from your employer to help you stay or return to work?**

Yes  No

## Costs related to healthcare

**19. How many times a month, on average, do you visit a healthcare professional for your PH?**

(include visits to GPs, local and specialist hospitals to see a doctor, nurse, blood tests, heart and breathing tests, imaging etc)

GP / local hospital \_\_\_\_\_ Specialist PH Centre \_\_\_\_\_ Other \_\_\_\_\_

**20. On average, approximately how much money has it cost you over the last year to visit the healthcare professionals – including travel, parking, any overnight stays (for you or your carer) if needed?**

GP / local hospital £ \_\_\_\_\_ Specialist PH centre £ \_\_\_\_\_ Other £ \_\_\_\_\_

**21. Since your diagnosis of PH do you spend the same, extra or less on the following items than before?**

|                                                                                                                | Extra                    | Same                     | Less                     | N/A                      |
|----------------------------------------------------------------------------------------------------------------|--------------------------|--------------------------|--------------------------|--------------------------|
| Help around the house or garden (eg. cleaner / gardener)                                                       | <input type="checkbox"/> | <input type="checkbox"/> | <input type="checkbox"/> | <input type="checkbox"/> |
| Gas / Electric                                                                                                 | <input type="checkbox"/> | <input type="checkbox"/> | <input type="checkbox"/> | <input type="checkbox"/> |
| General travel costs<br>(eg. to get to shops, see friends, get to work – not including hospital and GP visits) | <input type="checkbox"/> | <input type="checkbox"/> | <input type="checkbox"/> | <input type="checkbox"/> |
| Household bills (excluding gas and electric)                                                                   | <input type="checkbox"/> | <input type="checkbox"/> | <input type="checkbox"/> | <input type="checkbox"/> |
| Childcare                                                                                                      | <input type="checkbox"/> | <input type="checkbox"/> | <input type="checkbox"/> | <input type="checkbox"/> |
| Food costs/ special diet                                                                                       | <input type="checkbox"/> | <input type="checkbox"/> | <input type="checkbox"/> | <input type="checkbox"/> |

## Insurance costs

**22. Since your diagnosis, have you applied for life or travel insurance?**

Yes  No

**23. How easy did you and/or your partner find applying for insurances?**

Very easy  Quite easy  Quite difficult  Difficult  Extremely difficult

**24. Since your diagnosis, have you been refused insurance?**

Yes  No

**25. Have insurance quotes been similar / greater/ lower than before diagnosis?**

Similar  Greater  Lower

## General costs

**26. Since being diagnosed, for financial reasons, have you had to... (please tick all that apply)**

Take money from your savings

Cash in part or all of your pension

Borrow from your bank or building society   
(loan / overdraft)

Take out a credit card

Take out a payday loan

Borrow what you consider a significant amount  
from your parents

Borrow what you consider a significant amount  
from your children

Borrow what you consider a significant amount  
from your friends

Claim on health insurance

Sell some of your belongings to help pay for  
household bills

Sell your house (for financial reasons  
caused by your illness)

Visit a food bank

Miss picking up a prescription due to cost

Miss a hospital appointment due to the cost  
of travel or parking

**27. Overall, since being diagnosed, do you feel you have more difficulty paying bills?**

No   
difficulty

A little   
difficulty

Some   
difficulty

Much   
difficulty

Extreme   
difficulty

**28. Overall, after being diagnosed with pulmonary hypertension my financial situation has:**

Improved   
a lot

Improved   
a little

Remained   
the same

Declined   
a little

Declined   
a lot

**29. Has your condition caused you to fall into debt?**

No

A little

Some

A lot

Worrisome amount

**30. If your financial situation has declined, has this affected your mental / emotional wellbeing?**

Not at all

A little

At times

A lot

Severely affected

**31. Have you ever accessed or felt the need to access counselling / emotional support (eg. cognitive behavioural therapy or similar) as a result of concerns over your financial situation?**

Yes

No

*If you would like to add any comments relating to how pulmonary hypertension has affected your finances, please do so below (continue on an additional sheet if needed).*

---

---

---

---

**Please be assured that the information you provide in this survey will not be shared and will be destroyed once it has been used to input data.**

**Are you happy for us to contact you in order to clarify any of your responses? Yes  No**   
*If so, please provide your contact details below (there is no obligation to do this).*

**A THANK YOU FROM US. Would you like to enter our draw for a chance to win one of 150 £10 Love2shop vouchers? Yes  No  (www.highstreetvouchers.com)**  
*If so, please provide your contact details below so we can contact all the lucky winners.*

Name  Telephone

Email

**Thank you for your time.** By sharing your experiences, you are helping us to support others affected by pulmonary hypertension.

Pulmonary Hypertension Association UK

Tel: 01709 761450 Email: office@phauk.org

Website: www.phauk.org Registered Charity No. 1120756

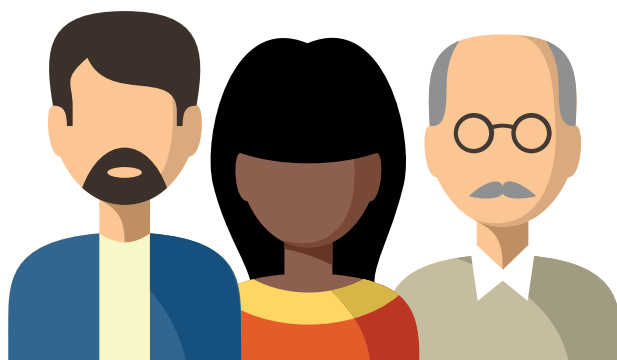

Supplement: 12890_2019_827_MOESM2_ESM.pdf [file 12890_2019_827_MOESM2_ESM.pdf]
